# Supplementary material
Source: PubMed Central journal article supplement (PMC3951464)
Supplement: 13_104_Sen.Suppl.pdf [file 13_104_Sen.Suppl.pdf]

Supplemental Data

**Systemic Administration of a Cyclic Signal Transducer and Activator of Transcription 3 (STAT3) Decoy Oligonucleotide Inhibits Tumor Growth without Inducing Toxicological Effects**

Malabika Sen,<sup>1</sup> Kathleen Paul,<sup>2</sup> Maria L Freilino,<sup>1</sup> Hua Li,<sup>1</sup> Changyou Li,<sup>2</sup> Daniel E Johnson,<sup>2,4</sup> Lin Wang,<sup>3</sup> Julie Eiseman,<sup>4,5</sup> and Jennifer R Grandis<sup>1,4</sup>

Online address: <http://www.molmed.org>

The Feinstein Institute  
for Medical Research 

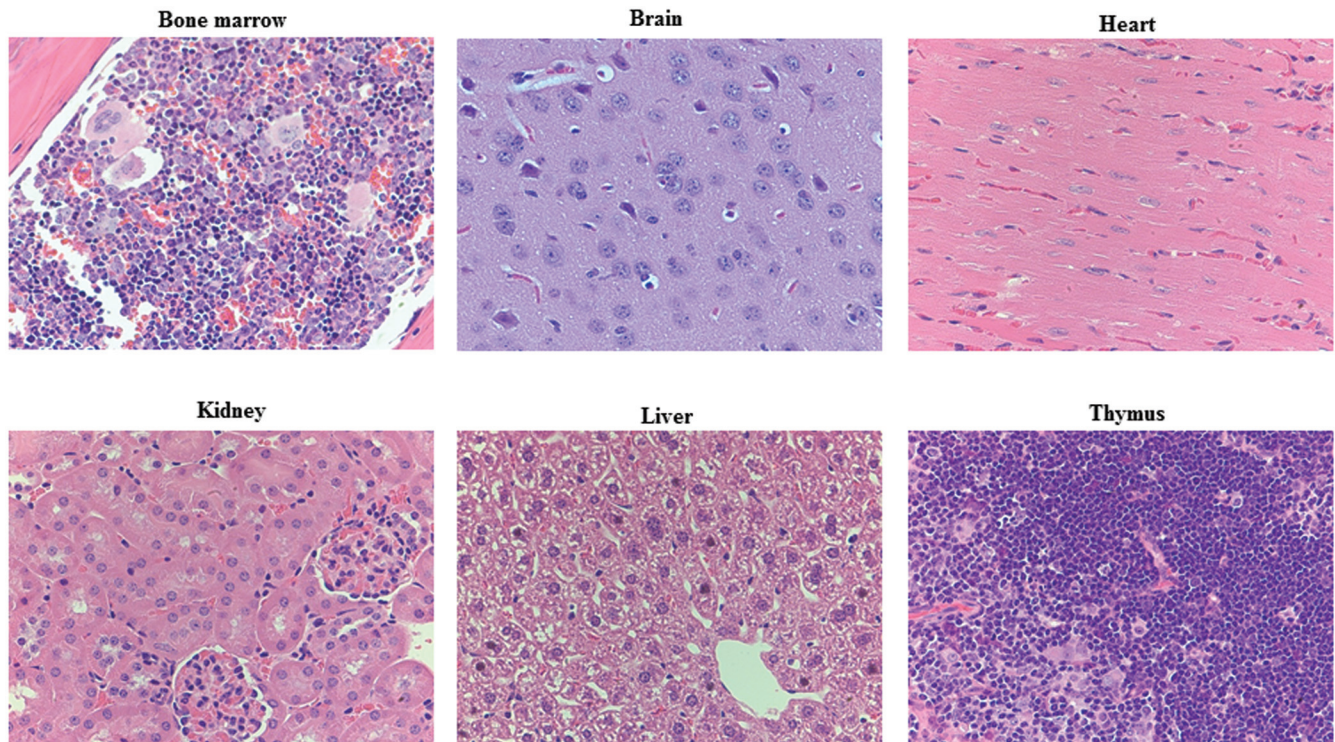

**Supplementary Figure S1.** Hematoxylin and eosin (H&E) staining of bone marrow, brain, heart, kidney, liver and thymus tissue from mice treated with 100mg/kg STAT3 decoy at 400x magnification.
